# Supplementary material
Source: publisher figshare collection journal article supplement (https://gsajournals.figshare.com/ndownloader/files/15051698)
Supplement: Supplementary file 1 [file 15051698]

## Sheet: Table Note 1a_SuppInfo
Table Note 1a_SuppInfo. Enriched GO terms identified in overrepresented genes in cisplatin-treated versus vehicle-treated wt melanoma medaka.
Database	Name	ID	fold enrichment; p-val
biological process	peptidyl-citrulline biosynthetic process from peptidyl-arginine	GO:0018101	E=0.01;R=325.11;rawP=5.59e-08
	citrulline biosynthetic process	GO:0019240	E=0.01;R=203.19;rawP=3.12e-07
	peptidyl-arginine modification	GO:0018195	E=0.02;R=135.46;rawP=1.22e-06
	citrulline metabolic process	GO:0000052	E=0.02;R=147.78;rawP=9.16e-07
	cellular modified amino acid biosynthetic process	GO:0042398	E=0.10;R=30.10;rawP=0.0001
	alpha-amino acid biosynthetic process	GO:1901607	E=0.11;R=26.65;rawP=0.0002
	cellular amino acid biosynthetic process	GO:0008652	E=0.13;R=23.22;rawP=0.0003
	regulation of calcium ion transport	GO:0051924	E=0.22;R=13.89;rawP=0.0013
	sensory perception	GO:0007600	E=0.91;R=5.47;rawP=0.0019
	regulation of calcium ion transport into cytosol	GO:0010522	E=0.09;R=21.67;rawP=0.0038
cellular component	connexon complex	GO:0005922	E=0.03;R=120.30;rawP=2.93e-08
	gap junction	GO:0005921	E=0.05;R=81.50;rawP=1.52e-07
	cell-cell junction	GO:0005911	E=0.46;R=10.97;rawP=7.90e-05
	cell junction	GO:0030054	E=1.17;R=5.14;rawP=0.0009
	plasma membrane part	GO:0044459	E=3.04;R=2.31;rawP=0.0264
	perinuclear region of cytoplasm	GO:0048471	E=0.74;R=4.05;rawP=0.0369
	endoplasmic reticulum	GO:0005783	E=2.03;R=2.46;rawP=0.0481
	apical part of cell	GO:0045177	E=0.47;R=4.30;rawP=0.0784
	proteinaceous extracellular matrix	GO:0005578	E=0.57;R=3.51;rawP=0.1105
	extracellular region	GO:0005576	E=3.39;R=1.77;rawP=0.1138
molecular function	protein-arginine deiminase activity	GO:0004668	E=0.01;R=382.10;rawP=3.40e-08
	hydrolase activity, acting on carbon-nitrogen (but not peptide) bonds, in linear amidines	GO:0016813	E=0.02;R=159.21;rawP=7.42e-07
	passive transmembrane transporter activity	GO:0022803	E=0.66;R=9.10;rawP=3.67e-05
	channel activity	GO:0015267	E=0.66;R=9.10;rawP=3.67e-05
	gap junction channel activity	GO:0005243	E=0.02;R=97.97;rawP=0.0002
	wide pore channel activity	GO:0022829	E=0.03;R=63.68;rawP=0.0004
	hydrolase activity, acting on carbon-nitrogen (but not peptide) bonds	GO:0016810	E=0.18;R=16.76;rawP=0.0007
	transporter activity	GO:0005215	E=1.88;R=3.73;rawP=0.0019
	transmembrane transporter activity	GO:0022857	E=1.45;R=4.13;rawP=0.0025
	substrate-specific channel activity	GO:0022838	E=0.63;R=6.34;rawP=0.0033
